# Supplementary figures and images for: Metabolome and Transcriptome Analyses of Red-colored Leaves From Eucommia Ulmoides ‘Huazhong No. 12’
Source: Research Square preprint supplement (doi:10.21203/rs.3.rs-104830/v1), 2020-11-13

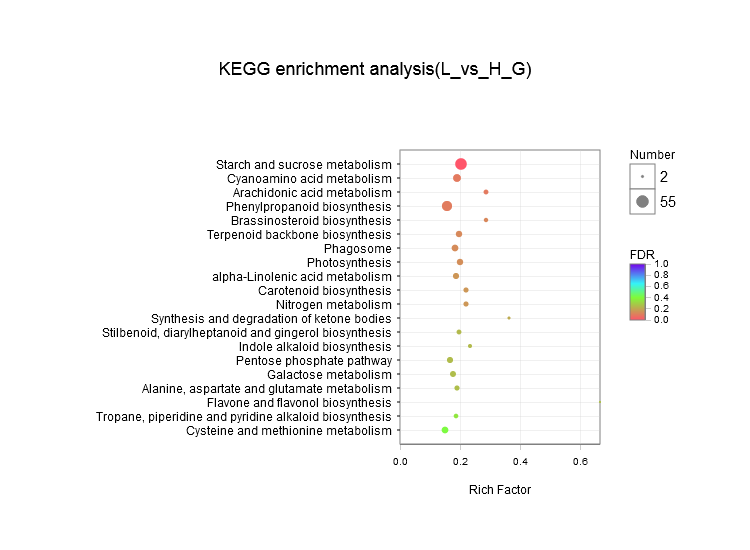


**Figure S4. KEGG enrichment analysis of differentially expressed genes**

Supplement: Supplementary file 1 [file 337e68c10c4b3dba8716c6bd.docx]
